# Supplementary material for: Structurally colored carbon fibers with controlled optical properties prepared by a fast and continuous electrophoretic deposition method
Source: Royal Society of Chemistry journal article supplement (doi:10.1039/c3nr01766d), 2013-01-01
Supplement: c3nr01766d.pdf [file c3nr01766d.pdf]

## Electronic Supplementary Information

### Structurally colored carbon fibers with controlled optical properties prepared by a fast and continuous electrophoretic deposition method

Zhifu Liu,<sup>a</sup> Qinghong Zhang,<sup>b</sup> Hongzhi Wang <sup>\*a</sup> and Yaogang Li <sup>\*b</sup>

<sup>a</sup> State Key Laboratory for Modification of Chemical Fibers and Polymer Materials, College of Materials Science and Engineering, Donghua University, Shanghai 201620, P. R. China. Fax: +86-021-67792855; Tel: +86-021-67792881; E-mail: wanghz@dhu.edu.cn

<sup>b</sup> Engineering Research Center of Advanced Glasses Manufacturing Technology, Ministry of Education, College of Materials Science and Engineering, Donghua University, Shanghai 201620, P. R. China. Fax: +86-021-67792855; Tel: +86-021-67792526; E-mail: yaogang\_li@dhu.edu.cn

### Size distribution and Zeta potential of PMMA particles

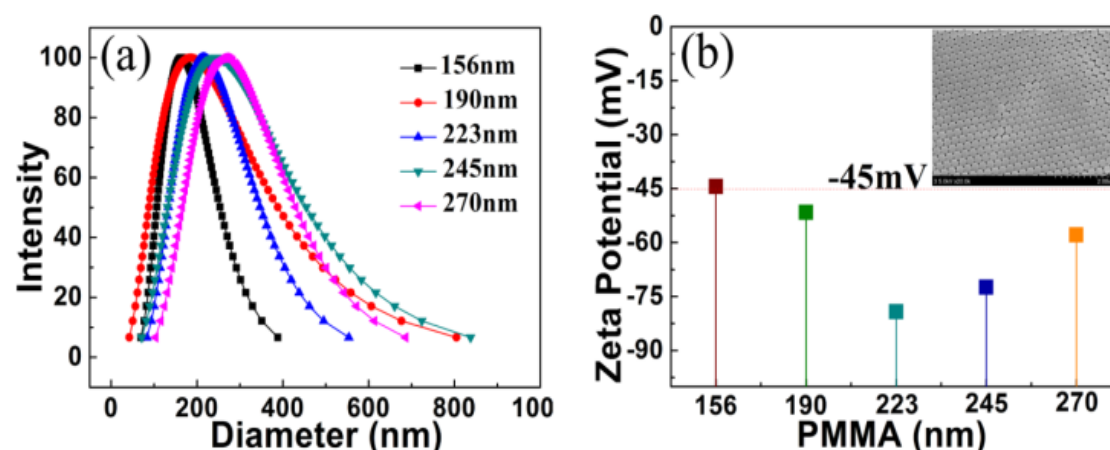

Fig. S1 Size distribution (a) and Zeta potential (b) of PMMA microspheres; the inset is the typical FE-SEM of the PMMA self-assembled structure.

## Experimental device by electrophoretic deposition

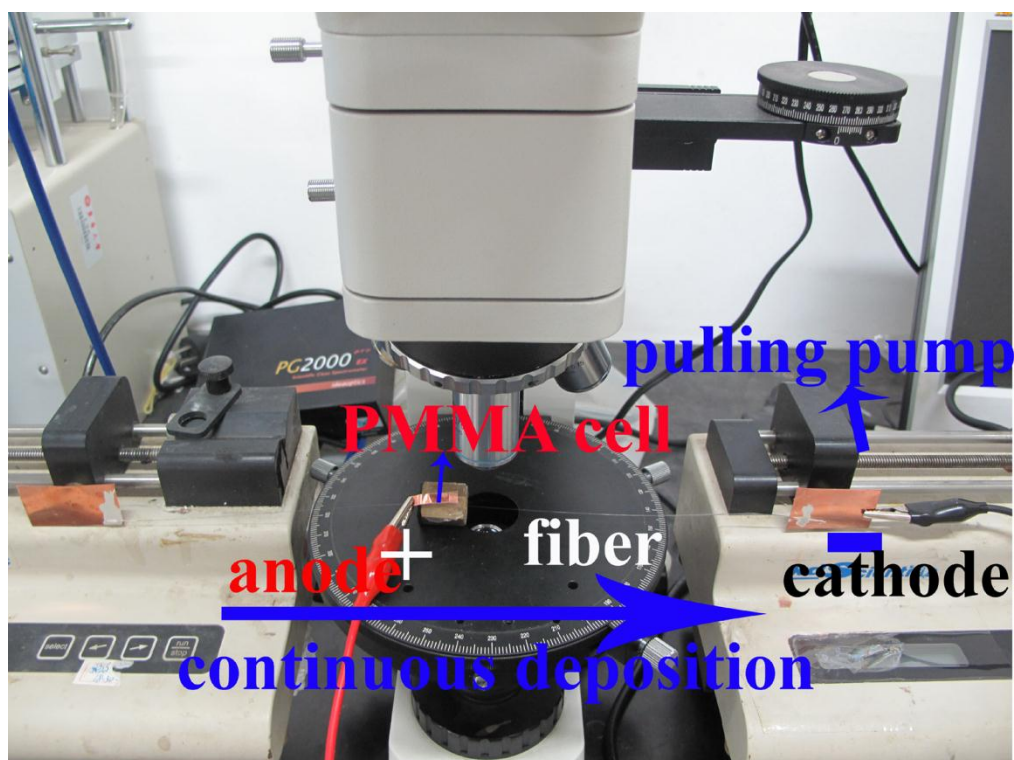

Fig. S2 instruments installation in the experiment using electrophoretic deposition method.

Video1 shows the continuous electrophoretic deposition PMMA particles on the fiber characterized by optical microscope.
